# Supplementary material for: Topological engineering of amphiphilic copolymers via RAFT dispersion copolymerization of benzyl methacrylate and 2-(perfluorooctyl)ethyl methacrylate for polymeric assemblies with tunable nanostructures
Source: Royal Society of Chemistry journal article supplement (doi:10.1039/c8py00029h), 2018-01-01
Supplement: c8py00029h1.pdf [file c8py00029h1.pdf]

## **Topological Engineering of the Amphiphilic Copolymer via RAFT Dispersion Copolymerization of Benzyl Methacrylate and 2-(Perfluorooctyl)ethyl Methacrylate for Polymeric Assemblies with Tunable Nanostructures**

Meng Huo,<sup>a,b</sup> Min Zeng,<sup>a</sup> Decheng Wu,<sup>\*,c</sup> Yen Wei<sup>\*,b</sup> and Jinying Yuan<sup>\*,a</sup>

<sup>a</sup> Key Lab of Organic Optoelectronics and Molecular Engineering of Ministry of Education, Department of Chemistry, Tsinghua University, 100084, Beijing, China. E-Mail: yuanjy@mail.tsinghua.edu.cn.

<sup>b</sup> Key Lab of Bioorganic Phosphorus Chemistry & Chemical Biology of Ministry of Education, Department of Chemistry, Tsinghua University, 100084, Beijing, China. E-Mail: weiyen@tsinghua.edu.cn.

<sup>c</sup> Beijing National Laboratory for Molecular Sciences, State Key Laboratory of Polymer Physics & Chemistry, Institute of Chemistry, Chinese Academy of Sciences, Beijing 100190, China. E-Mail: dcwu@iccas.ac.cn.

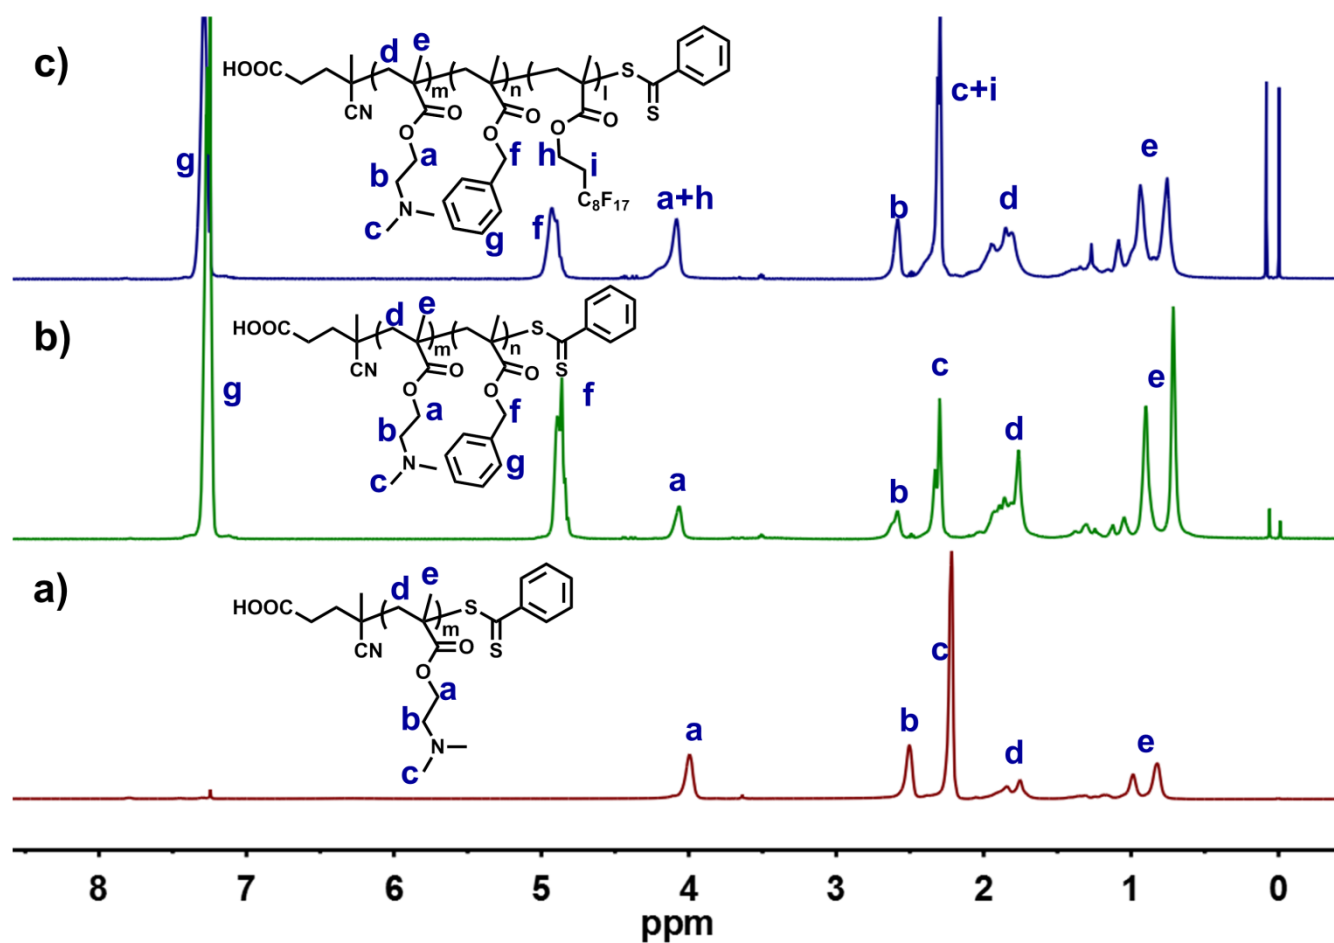

**Fig. S1** a)  $^1\text{H}$  NMR spectra of a) PDMA<sub>42</sub>, b) PDMA-*b*-PBzMA-35k, and c) PDMA-*b*-P(BzMA-co-FMA)-35k-50. Solvent:  $\text{CDCl}_3$  for PDMA<sub>42</sub> and PDMA-*b*-PBzMA-35k;  $\text{CDCl}_3/\text{CF}_2\text{ClCFCl}_2$  (1/1, v/v) for PDMA-*b*-P(BzMA-co-FMA)-35k-50.

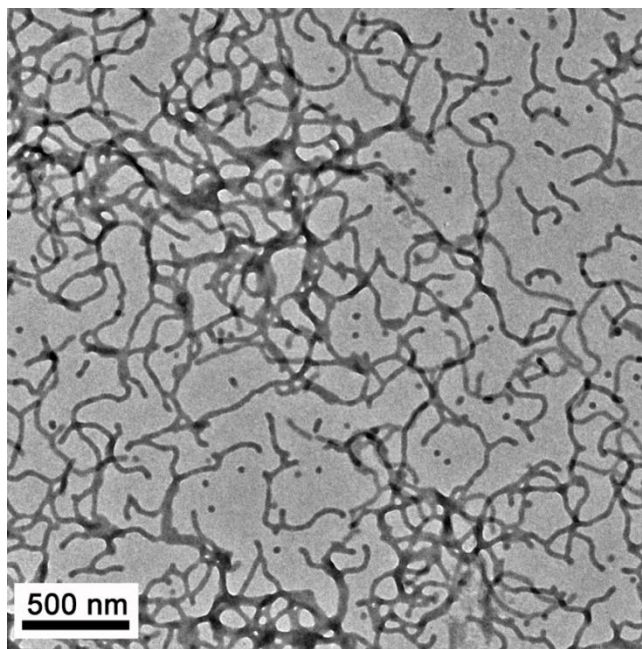

**Fig. S2** TEM image of PDMA-*b*-P(BzMA-co-FMA)-35k-50 assemblies.

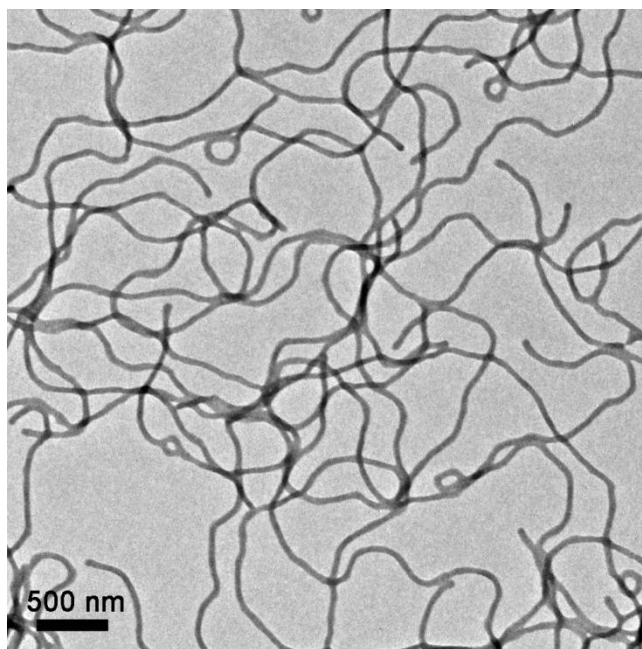

**Fig. S3** TEM image of PDMA-*b*-P(BzMA-co-FMA)-63k-70 assemblies.

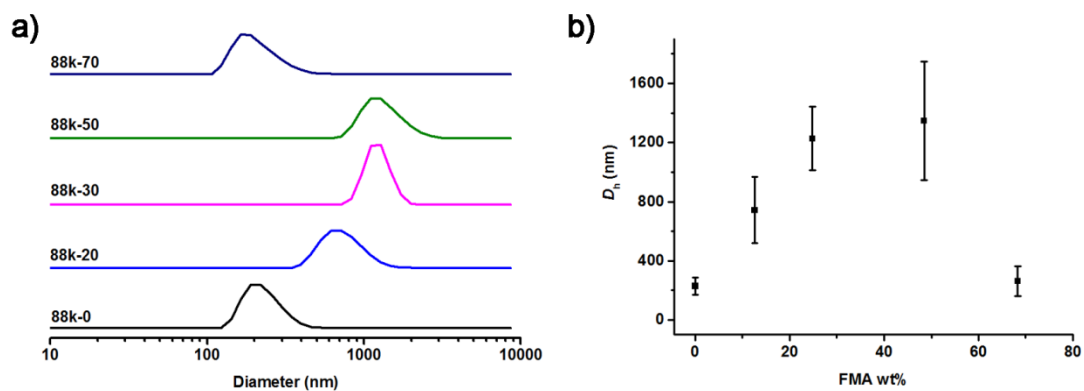

**Fig. S4** a) DLS profiles and b) number-averaged diameters of the PDMA-*b*-P(BzMA-*co*-FMA)-88k-*x* (*x* = 0, 20, 30, 50, 70) assemblies.

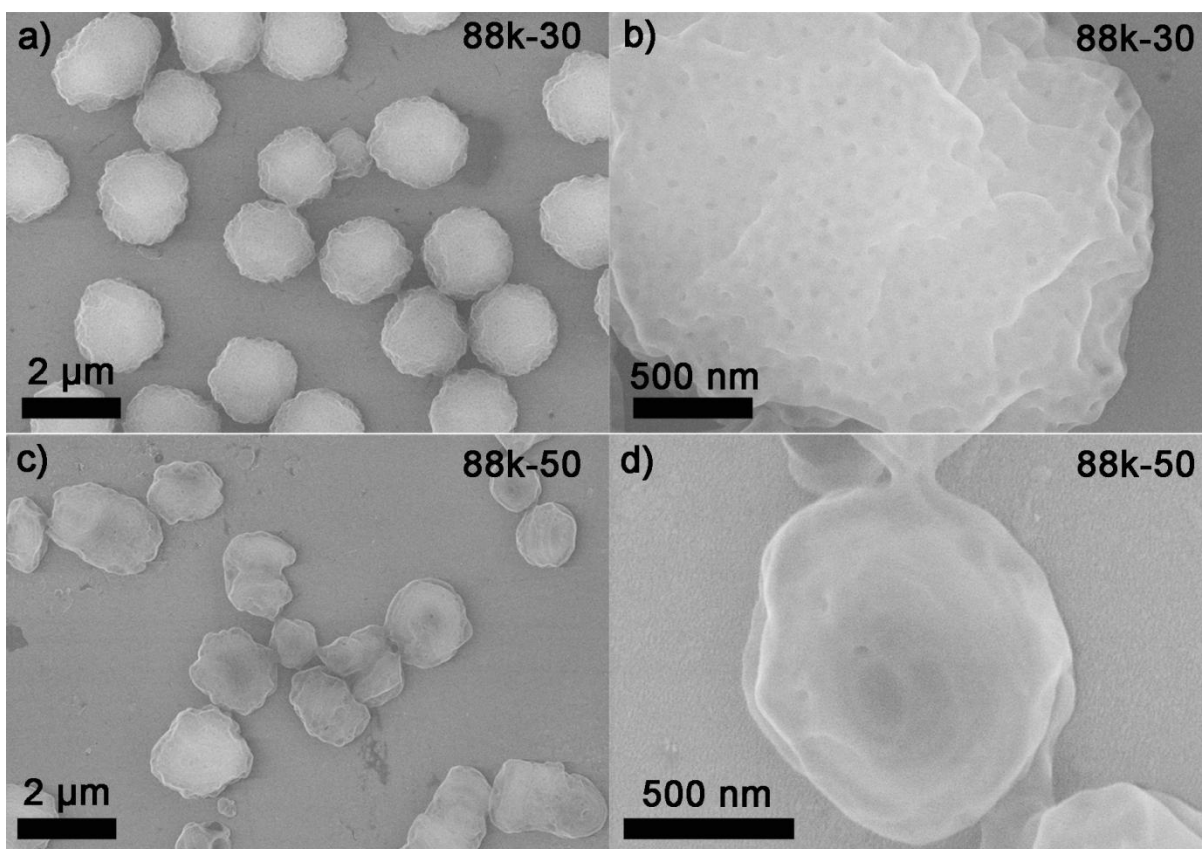

**Fig. S5** SEM images of a), b) PDMA-*b*-P(BzMA-*co*-FMA)-88k-30 and c), d) PDMA-*b*-P(BzMA-*co*-FMA)-88k-50 assemblies.

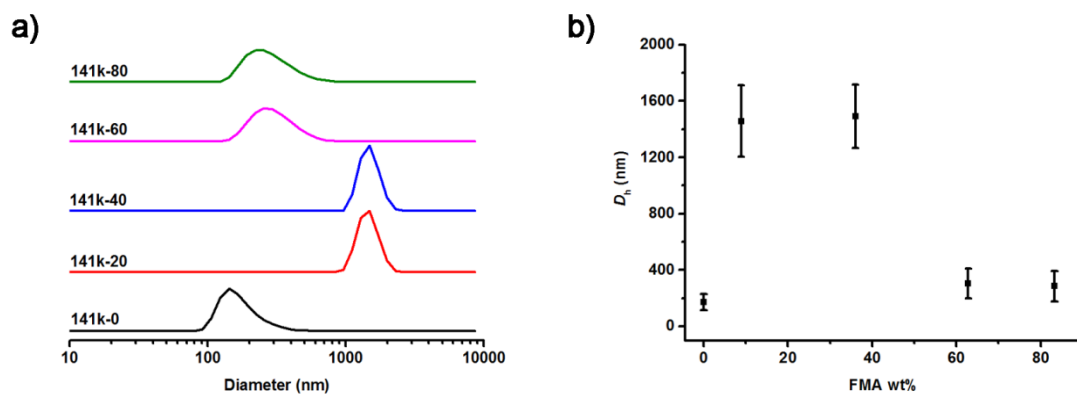

**Fig. S6** a) DLS profiles and b) number-averaged diameters of the PDMA-*b*-P(BzMA-*co*-FMA)-141k-*x* (*x* = 0, 20, 40, 60, 80) assemblies.

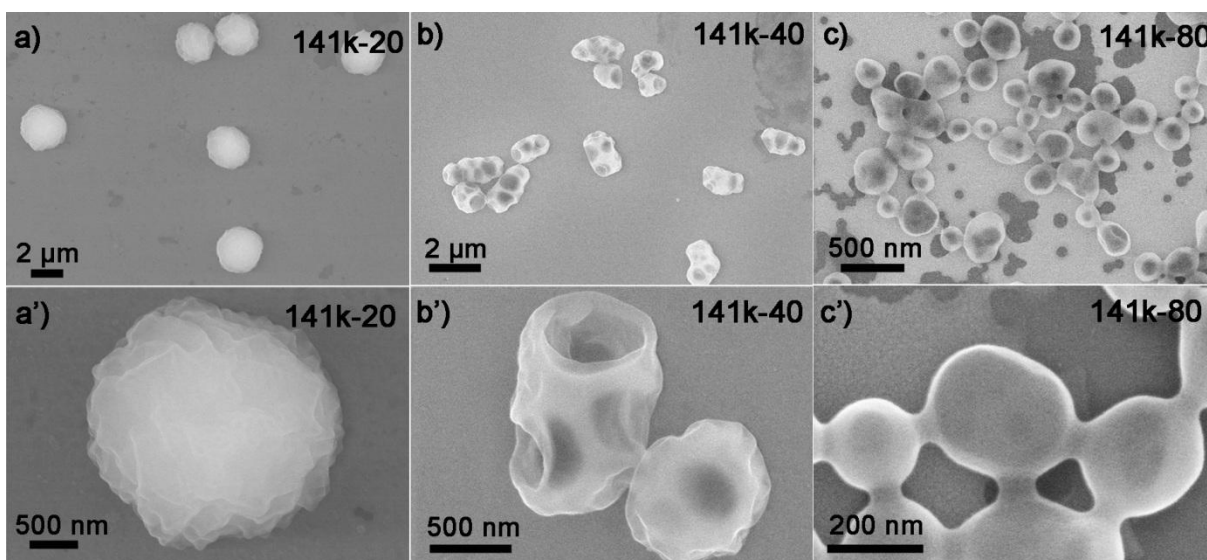

**Fig. S7** SEM images of a) a') PDMA-*b*-P(BzMA-*co*-FMA)-141k-20, b) b') PDMA-*b*-P(BzMA-*co*-FMA)-141k-40 and c) c') PDMA-*b*-P(BzMA-*co*-FMA)-141k-80 assemblies.
